# Supplementary material
Source: PubMed Central journal article supplement (PMC4652593)
Supplement: NIHMS277564-supplement-Figure_S2.pdf [file NIHMS277564-supplement-Figure_S2.pdf]

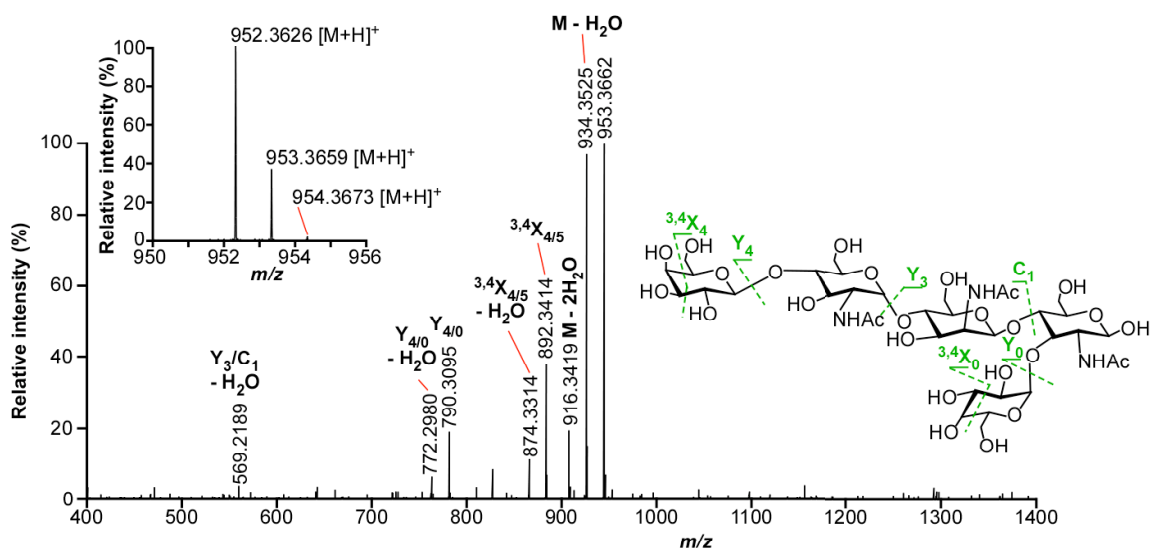

**Figure S2.**

Collision-induced disassociation (CID) tandem mass spectrometry of parent ion  $m/z = 952.3626$  (left inset) confirms the proposed structural configuration of the SCWP (right inset).
